# Supplementary material for: Demographic factors impact the rate of hearing decline across the adult lifespan
Source: PubMed Central journal article supplement — Commun Med (Lond). 2024 Aug 30;4:171. doi: 10.1038/s43856-024-00593-w (PMC11364848; doi:10.1038/s43856-024-00593-w), 2024-08-30
Supplement: 43856_2024_593_MOESM1_ESM.pdf [file 43856_2024_593_MOESM1_ESM.pdf]

### ***Supplementary Information for:***

#### **Demographic factors impact the rate of hearing decline across the adult lifespan**

Lauren K Dillard<sup>a</sup>, Lois J Matthews<sup>a</sup>, Lizmarie Maldonado<sup>b</sup>, Annie N Simpson<sup>a,b</sup>, Judy R Dubno<sup>a</sup>

<sup>a</sup>Department of Otolaryngology- Head & Neck Surgery, Medical University of South Carolina, Charleston, SC, USA

<sup>b</sup>Department of Healthcare Leadership & Management, Medical University of South Carolina, Charleston, SC, USA

#### Supplementary Tables and Figure:

- Supplementary Table 1: Baseline characteristics, including other factors to characterize the study population.
- Supplementary Table 2: Baseline thresholds and PTA (dB HL), by sex, race, and age group.
- Supplementary Table 3: Adjusted estimates of rates of change of audiometric thresholds and PTA (dB), per year, stratified by sex.
- Supplementary Table 4: Adjusted estimates of rates of change of audiometric thresholds and PTA (dB), per year, stratified by race.
- Supplementary Table 5: Adjusted estimates of rates of change of audiometric thresholds and PTA (dB), per year, stratified by baseline age group.
- Supplementary Table 6: Unadjusted estimates of rates of change of audiometric thresholds and PTA (dB) per year, stratified by baseline age group, then sex and race.
- Supplementary Figure 1: Average rates of audiometric threshold and PTA change (dB) per year, stratified by baseline age group (years), then sex.
- Supplementary Table 7: Unadjusted estimates of rates of change of audiometric thresholds and PTA (dB), per year.
- Supplementary Table 8: Unadjusted estimates of rates of change of audiometric thresholds and PTA (dB), per year, stratified by sex.
- Supplementary Table 9: Unadjusted estimates of rates of change of audiometric thresholds and PTA (dB) per year, stratified by race.
- Supplementary Table 10: Unadjusted estimates of rates of change of audiometric thresholds and PTA (dB) per year, stratified by baseline age group.

Supplementary Table 1: Baseline characteristics, including other factors to characterize the study population.

| Characteristic                        | n or mean | % or SD |
|---------------------------------------|-----------|---------|
| Age (years)                           | 63.1      | 14.9    |
| Female sex                            | 828       | 57.7%   |
| Race                                  |           |         |
| White                                 | 1180      | 82.2%   |
| Black/African American                | 246       | 17.1%   |
| Other                                 | 10        | 0.7%    |
| Socioeconomic position proxy          |           |         |
| Low                                   | 242       | 27.1%   |
| Mid                                   | 180       | 20.2%   |
| High                                  | 471       | 52.7%   |
| Noise exposure                        | 646       | 47.8%   |
| Diabetes                              | 154       | 11.2%   |
| Number of cardiovascular risk factors |           |         |
| 0                                     | 561       | 39.0%   |
| 1                                     | 420       | 29.2%   |
| 2                                     | 278       | 19.3%   |
| 3                                     | 109       | 7.6%    |
| 4+                                    | 70        | 4.9%    |
| Body mass index (kg/m <sup>2</sup> )  | 26.8      | 5.3     |

Note. Details for age, sex, and race are presented in Table 1 (main text) and are included here for ease of interpretation. Only race data are imputed. Citations numbers in definitions section (below) refer to references in the main text. SD: standard deviation.

### Definitions:

**Socioeconomic position (SEP) proxy:** This proxy was determined from participants' number of years of education and baseline occupation.<sup>1</sup> SEP proxy classifications were determined for education and occupation, separately, by classifying education and occupation as low, mid, or high, then these classifications were combined to form a single SEP proxy. Educational classifications were low (high school degree or less; ≤12 years), mid (associate degree or some college; 12 to <16 years) or high (college graduate or more; 16+ years). Occupational classifications were derived from US annual salary data, which were used to classify occupations as low (operatives; labors and helpers; service workers), mid (technicians; sales workers; administrative support workers; craft workers), and high (executive/senior officials and managers; first/mid-level officials and managers; professionals).<sup>1</sup>

**Noise exposure:** Positive history of occupational (including military) noise exposure and/or regular firearm use for at least one year, and/or acute acoustical trauma.<sup>2</sup>

**Diabetes:** Self-reported history of diabetes (type 1 or 2).

**Number of cardiovascular risk factors:** Total number (sum) of self-reported history of the following factors: high cholesterol, chest pain, heart problems, high blood pressure, shortness of breath, stroke.

**Body mass index:** Self-reported weight in kilograms (kg) divided by self-reported height in meters (m) squared.

Supplementary Table 2: Baseline thresholds and PTA (dB HL), by sex, race, and age group.

|                            | Sex            |      |              |      | Race <sup>†</sup> |      |                 |      |
|----------------------------|----------------|------|--------------|------|-------------------|------|-----------------|------|
|                            | Mean           | SD   | Mean         | SD   | Mean              | SD   | Mean            | SD   |
| <b>18-39 years (n=154)</b> |                |      |              |      |                   |      |                 |      |
|                            | Female (n=91)  |      | Male (n=63)  |      | White (n=117)     |      | Black/AA (n=31) |      |
| Frequency (Hz)             |                |      |              |      |                   |      |                 |      |
| 250                        | 8.0            | 7.7  | 7.1          | 6.1  | 7.2               | 6.1  | 10.0            | 9.9  |
| 500                        | 6.3            | 7.5  | 6.2          | 6.3  | 5.8               | 6.2  | 8.1             | 9.7  |
| 1000                       | 5.6            | 8.6  | 5.5          | 7.6  | 5.0               | 7.9  | 7.9             | 9.5  |
| 2000                       | 5.2            | 9.3  | 7.1          | 9.8  | 5.4               | 9.4  | 8.6             | 10.3 |
| 3000                       | 3.3            | 7.3  | 13.6         | 18.4 | 7.7               | 15.5 | 7.6             | 8.3  |
| 4000                       | 6.7            | 11.6 | 17.0         | 23.1 | 11.2              | 19.3 | 10.7            | 14.0 |
| 6000                       | 12.4           | 11.9 | 21.7         | 23.6 | 17.4              | 19.7 | 13.3            | 11.8 |
| 8000                       | 9.7            | 12.5 | 18.2         | 20.2 | 13.9              | 17.3 | 11.6            | 15.0 |
| PTA                        | 6.0            | 8.2  | 8.9          | 9.8  | 6.8               | 9.0  | 8.9             | 9.7  |
| <b>40-59 years (n=231)</b> |                |      |              |      |                   |      |                 |      |
|                            | Female (n=127) |      | Male (n=104) |      | White (n=148)     |      | Black/AA (n=82) |      |
| 250                        | 11.9           | 11.4 | 10.3         | 8.3  | 11.1              | 10.9 | 11.5            | 8.5  |
| 500                        | 11.9           | 11.7 | 10.6         | 8.7  | 11.8              | 11.6 | 10.5            | 8.1  |
| 1000                       | 12.8           | 12.3 | 13.1         | 11.1 | 13.1              | 12.9 | 12.7            | 9.5  |
| 2000                       | 15.9           | 14.6 | 19.7         | 16.5 | 19.1              | 17.5 | 15.2            | 10.9 |
| 3000                       | 16.9           | 16.4 | 29.7         | 21.1 | 25.8              | 22.1 | 17.3            | 12.6 |
| 4000                       | 20.8           | 16.1 | 38.9         | 22.1 | 32.6              | 23.2 | 22.7            | 14.6 |
| 6000                       | 27.2           | 18.4 | 40.2         | 22.5 | 37.4              | 23.3 | 25.5            | 14.4 |
| 8000                       | 27.7           | 19.9 | 40.7         | 23.2 | 37.8              | 24.2 | 26.4            | 16.0 |
| PTA                        | 15.4           | 11.8 | 20.6         | 11.8 | 19.2              | 13.2 | 15.3            | 9.2  |
| <b>60-69 years (n=547)</b> |                |      |              |      |                   |      |                 |      |
|                            | Female (n=313) |      | Male (n=234) |      | White (n=472)     |      | Black/AA (n=73) |      |
| 250                        | 14.3           | 9.0  | 13.9         | 9.4  | 13.9              | 9.2  | 15.5            | 8.7  |
| 500                        | 14.7           | 9.8  | 13.9         | 10.7 | 14.3              | 10.3 | 15.0            | 9.3  |
| 1000                       | 15.4           | 11.5 | 17.9         | 13.4 | 16.4              | 12.7 | 17.2            | 10.9 |
| 2000                       | 20.0           | 14.6 | 29.9         | 19.1 | 24.6              | 17.8 | 21.9            | 14.1 |
| 3000                       | 23.8           | 15.8 | 44.9         | 20.3 | 34.1              | 20.9 | 25.2            | 17.2 |
| 4000                       | 29.7           | 16.1 | 55.0         | 20.5 | 42.4              | 22.1 | 29.2            | 17.9 |
| 6000                       | 38.1           | 18.6 | 60.5         | 21.7 | 49.7              | 22.7 | 35.7            | 19.8 |
| 8000                       | 42.0           | 20.4 | 61.5         | 20.7 | 52.2              | 22.2 | 38.9            | 22.5 |
| PTA                        | 19.9           | 11.2 | 29.2         | 13.0 | 24.4              | 13.1 | 20.8            | 10.7 |
| <b>70+ years (n=504)</b>   |                |      |              |      |                   |      |                 |      |
|                            | Female (n=297) |      | Male (n=207) |      | White (n=443)     |      | Black/AA(n=60)  |      |
| 250                        | 20.6           | 11.4 | 18.7         | 11.7 | 19.6              | 11.6 | 21.5            | 10.7 |
| 500                        | 21.8           | 12.7 | 20.1         | 13.0 | 20.9              | 12.8 | 22.3            | 12.4 |
| 1000                       | 23.6           | 14.9 | 25.6         | 15.6 | 24.4              | 15.3 | 24.2            | 14.5 |
| 2000                       | 30.6           | 16.1 | 40.4         | 20.0 | 35.1              | 18.7 | 31.0            | 16.6 |
| 3000                       | 35.1           | 16.6 | 53.6         | 19.7 | 44.0              | 20.1 | 33.2            | 17.8 |
| 4000                       | 42.4           | 17.8 | 64.4         | 19.0 | 53.2              | 20.8 | 37.8            | 19.4 |
| 6000                       | 52.0           | 19.2 | 69.4         | 19.8 | 60.8              | 20.9 | 46.4            | 19.3 |
| 8000                       | 59.9           | 19.8 | 73.1         | 17.5 | 66.6              | 19.5 | 55.9            | 20.7 |
| PTA                        | 29.6           | 13.6 | 37.6         | 14.5 | 33.4              | 14.4 | 28.8            | 14.3 |

Note. PTA: pure-tone average, calculated from frequencies 500, 1000, 2000 and 4000 Hz averaged across right and left ears; SD: standard deviation; dB HL: decibel hearing level; AA: African American.

<sup>†</sup>Participants who were not white or Black/African American race (categorized as Other race) were excluded from these analyses given small sample size (n=10; see Table 1).

Supplementary Table 3: Adjusted estimates of rates of change of audiometric thresholds and PTA (dB), per year, stratified by sex.

|                | Females<br>(n=828) |      |      | Males<br>(n=608) |      |      | Difference<br>by sex |
|----------------|--------------------|------|------|------------------|------|------|----------------------|
|                | 95% CI             |      |      | 95% CI           |      |      |                      |
|                | B                  | LL   | UL   | B                | LL   | UL   | p-value              |
| Frequency (Hz) |                    |      |      |                  |      |      |                      |
| 250            | 0.41               | 0.36 | 0.46 | 0.42             | 0.37 | 0.48 | 0.5075               |
| 500            | 0.55               | 0.50 | 0.61 | 0.58             | 0.52 | 0.64 | 0.4960               |
| 1000           | 0.71               | 0.65 | 0.77 | 0.80             | 0.73 | 0.87 | 0.0769               |
| 2000           | 0.91               | 0.84 | 0.98 | 1.07             | 0.99 | 1.15 | 0.0035               |
| 3000           | 0.99               | 0.93 | 1.06 | 0.92             | 0.84 | 0.99 | 0.2014               |
| 4000           | 1.03               | 0.96 | 1.10 | 0.88             | 0.81 | 0.95 | 0.0110               |
| 6000           | 1.22               | 1.13 | 1.30 | 1.01             | 0.93 | 1.10 | 0.0034               |
| 8000           | 1.53               | 1.44 | 1.62 | 1.31             | 1.22 | 1.39 | 0.0007               |
| PTA            | 0.81               | 0.76 | 0.86 | 0.85             | 0.80 | 0.90 | 0.2832               |

Note. Estimates (adjusted for race) correspond to those plotted in Figure 1 (main text). B: Beta coefficient; CI: Confidence Interval; LL: Lower limit; UL: Upper limit; PTA: pure-tone average, calculated from frequencies 500, 1000, 2000 and 4000 Hz averaged across right and left ears; dB: decibels.

Supplementary Table 4: Adjusted estimates of rates of change of audiometric thresholds and PTA (dB), per year, stratified by race.

|                | White<br>(n=1180) |      |      | Black/AA <sup>†</sup><br>(n=246) |      |      | Difference<br>by race |
|----------------|-------------------|------|------|----------------------------------|------|------|-----------------------|
|                | 95% CI            |      |      | 95% CI                           |      |      |                       |
|                | B                 | LL   | UL   | B                                | LL   | UL   | p-value               |
| Frequency (Hz) |                   |      |      |                                  |      |      |                       |
| 250            | 0.44              | 0.40 | 0.48 | 0.30                             | 0.22 | 0.37 | 0.0350                |
| 500            | 0.58              | 0.54 | 0.63 | 0.45                             | 0.37 | 0.54 | 0.0929                |
| 1000           | 0.79              | 0.74 | 0.84 | 0.57                             | 0.47 | 0.67 | 0.0016                |
| 2000           | 1.02              | 0.96 | 1.08 | 0.74                             | 0.63 | 0.87 | 0.0006                |
| 3000           | 1.00              | 0.94 | 1.06 | 0.77                             | 0.66 | 0.89 | 0.0055                |
| 4000           | 1.00              | 0.95 | 1.06 | 0.83                             | 0.72 | 0.95 | 0.0533                |
| 6000           | 1.17              | 1.11 | 1.24 | 0.91                             | 0.76 | 1.05 | 0.0191                |
| 8000           | 1.46              | 1.40 | 1.53 | 1.28                             | 1.12 | 1.44 | 0.1492                |
| PTA            | 0.85              | 0.81 | 0.90 | 0.66                             | 0.57 | 0.76 | 0.3131                |

Note. Estimates (adjusted for sex) correspond to those plotted in Figure 2 (main text). B: Beta coefficient; CI: Confidence Interval; LL: Lower limit; UL: Upper limit; PTA: pure-tone average, calculated from frequencies 500, 1000, 2000 and 4000 Hz averaged across right and left ears; dB: decibels; AA: African American.

<sup>†</sup>Participants who were not white or Black/African American race (categorized as Other race) were excluded from these analyses given small sample size (n=10; see Table 1).

Supplementary Table 5: Adjusted estimates of rates of change of audiometric thresholds and PTA (dB), per year, stratified by baseline age group.

|                | 18-40 years<br>(n=154) |       |      | 41-60 years<br>(n=231) |      |      | 61-70 years<br>(n=547) |      |      | 71+ years<br>(n=504) |      |      | Difference<br>by baseline<br>age |
|----------------|------------------------|-------|------|------------------------|------|------|------------------------|------|------|----------------------|------|------|----------------------------------|
|                | 95% CI                 |       |      | 95% CI                 |      |      | 95% CI                 |      |      | 95% CI               |      |      |                                  |
|                | B                      | LL    | UL   | B                      | LL   | UL   | B                      | LL   | UL   | B                    | LL   | UL   | p-value                          |
| Frequency (Hz) |                        |       |      |                        |      |      |                        |      |      |                      |      |      |                                  |
| 250            | 0.04                   | -0.13 | 0.21 | 0.25                   | 0.09 | 0.40 | 0.41                   | 0.34 | 0.48 | 0.68                 | 0.57 | 0.78 | 0.0002                           |
| 500            | 0.15                   | -0.02 | 0.31 | 0.43                   | 0.28 | 0.58 | 0.62                   | 0.55 | 0.69 | 0.83                 | 0.73 | 0.93 | 5.0 x 10 <sup>-9</sup>           |
| 1000           | 0.23                   | 0.04  | 0.43 | 0.63                   | 0.47 | 0.79 | 0.77                   | 0.69 | 0.85 | 1.11                 | 1.10 | 1.21 | 1.7 x 10 <sup>-9</sup>           |
| 2000           | 0.25                   | 0.08  | 0.41 | 0.67                   | 0.51 | 0.84 | 1.05                   | 0.96 | 1.14 | 1.29                 | 1.17 | 1.41 | 0.0992                           |
| 3000           | 0.28                   | 0.02  | 0.53 | 0.72                   | 0.56 | 0.89 | 0.99                   | 0.90 | 1.08 | 1.16                 | 1.05 | 1.28 | 0.7793                           |
| 4000           | 0.32                   | 0.12  | 0.52 | 0.76                   | 0.58 | 0.93 | 1.03                   | 0.94 | 1.12 | 1.04                 | 0.93 | 1.15 | 0.5740                           |
| 6000           | 0.31                   | 0.18  | 0.44 | 0.84                   | 0.60 | 1.07 | 1.17                   | 1.06 | 1.28 | 1.30                 | 1.17 | 1.43 | 0.8469                           |
| 8000           | 0.53                   | 0.26  | 0.79 | 1.39                   | 1.12 | 1.66 | 1.56                   | 1.46 | 1.67 | 1.46                 | 1.32 | 1.60 | 0.4207                           |
| PTA            | 0.27                   | 0.12  | 0.43 | 0.64                   | 0.51 | 0.77 | 0.87                   | 0.81 | 0.93 | 1.07                 | 0.98 | 1.15 | 0.0005                           |

Note. Estimates (adjusted for sex and race) correspond to those plotted in Figure 3 (main text).  
 B: Beta coefficient; CI: Confidence Interval; LL: Lower limit; UL: Upper limit; PTA: pure-tone average, calculated from frequencies 500, 1000, 2000 and 4000 Hz averaged across right and left ears; dB: decibels.

Supplementary Table 6: Unadjusted estimates of rates of change of audiometric thresholds and PTA (dB) per year, stratified by baseline age group, then sex and race.

|                            | Sex            |       |      |              |       |      | Race†         |       |      |                 |       |      |
|----------------------------|----------------|-------|------|--------------|-------|------|---------------|-------|------|-----------------|-------|------|
|                            | 95% CI         |       |      | 95% CI       |       |      | 95% CI        |       |      | 95% CI          |       |      |
|                            | B              | LL    | UL   | B            | LL    | UL   | B             | LL    | UL   | B               | LL    | UL   |
| <b>18-39 years (n=154)</b> |                |       |      |              |       |      |               |       |      |                 |       |      |
|                            | Female (n=91)  |       |      | Male (n=63)  |       |      | White (n=117) |       |      | Black/AA (n=31) |       |      |
| Frequency (Hz)             |                |       |      |              |       |      |               |       |      |                 |       |      |
| 250                        | -0.08          | -0.27 | 0.10 | 0.07         | -0.16 | 0.31 | 0.11          | -0.06 | 0.27 | -0.08           | -0.42 | 0.27 |
| 500                        | 0.07           | -0.13 | 0.26 | 0.23         | -0.03 | 0.50 | 0.20          | 0.04  | 0.35 | -0.28           | -0.78 | 0.22 |
| 1000                       | 0.13           | -0.09 | 0.35 | 0.10         | 0.05  | 0.26 | 0.30          | 0.12  | 0.49 | -0.04           | -0.50 | 0.42 |
| 2000                       | 0.23           | 0.02  | 0.43 | 0.26         | -0.01 | 0.53 | 0.26          | 0.07  | 0.45 | 0.21            | -0.24 | 0.65 |
| 3000                       | 0.10           | -0.15 | 0.35 | 0.41         | -0.05 | 0.87 | 0.31          | -0.01 | 0.64 | 0.49            | 0.27  | 0.70 |
| 4000                       | 0.29           | 0.01  | 0.57 | 0.35         | 0.20  | 0.51 | 0.25          | -0.02 | 0.53 | 0.34            | -0.26 | 0.94 |
| 6000                       | -0.16          | -0.51 | 0.19 | 0.63         | 0.57  | 0.70 | 0.55          | 0.38  | 0.72 | -0.04           | -0.73 | 0.64 |
| 8000                       | 0.37           | 0.03  | 0.71 | 0.71         | 0.47  | 0.95 | 0.76          | 0.44  | 1.08 | 0.02            | -0.69 | 0.74 |
| PTA                        | 0.15           | -0.05 | 0.36 | 0.25         | 0.01  | 0.49 | 0.28          | 0.10  | 0.45 | 0.06            | -0.40 | 0.51 |
| <b>40-59 years (n=231)</b> |                |       |      |              |       |      |               |       |      |                 |       |      |
|                            | Female (n=127) |       |      | Male (n=104) |       |      | White (n=148) |       |      | Black/AA (n=82) |       |      |
| 250                        | 0.22           | -0.03 | 0.46 | 0.27         | 0.09  | 0.46 | 0.24          | 0.04  | 0.44 | 0.19            | -0.05 | 0.44 |
| 500                        | 0.48           | 0.26  | 0.69 | 0.40         | 0.20  | 0.60 | 0.36          | 0.18  | 0.54 | 0.52            | 0.26  | 0.77 |
| 1000                       | 0.59           | 0.35  | 0.82 | 0.69         | 0.47  | 0.90 | 0.69          | 0.50  | 0.89 | 0.41            | 0.12  | 0.70 |
| 2000                       | 0.55           | 0.35  | 0.74 | 0.85         | 0.57  | 1.12 | 0.67          | 0.47  | 0.87 | 0.62            | 0.36  | 0.88 |
| 3000                       | 0.75           | 0.51  | 0.98 | 0.70         | 0.50  | 0.91 | 0.73          | 0.54  | 0.92 | 0.70            | 0.37  | 1.03 |
| 4000                       | 0.75           | 0.48  | 1.02 | 0.77         | 0.60  | 0.94 | 0.78          | 0.58  | 0.98 | 0.70            | 0.34  | 1.07 |
| 6000                       | 0.82           | 0.48  | 1.15 | 0.91         | 0.61  | 1.21 | 1.02          | 0.75  | 1.29 | 0.36            | -0.01 | 0.73 |
| 8000                       | 1.41           | 1.04  | 1.77 | 1.45         | 1.03  | 1.86 | 1.50          | 1.18  | 1.83 | 1.00            | 0.57  | 1.43 |
| PTA                        | 0.61           | 0.42  | 0.80 | 0.67         | 0.51  | 0.83 | 0.62          | 0.47  | 0.78 | 0.63            | 0.41  | 0.85 |
| <b>60-69 years (n=547)</b> |                |       |      |              |       |      |               |       |      |                 |       |      |
|                            | Female (n=313) |       |      | Male (n=234) |       |      | White (n=472) |       |      | Black/AA (n=73) |       |      |
| 250                        | 0.39           | 0.29  | 0.48 | 0.44         | 0.34  | 0.54 | 0.43          | 0.36  | 0.50 | 0.25            | 0.02  | 0.47 |
| 500                        | 0.57           | 0.48  | 0.66 | 0.68         | 0.58  | 0.78 | 0.63          | 0.56  | 0.70 | 0.57            | 0.33  | 0.81 |
| 1000                       | 0.69           | 0.59  | 0.80 | 0.86         | 0.74  | 0.99 | 0.79          | 0.71  | 0.88 | 0.60            | 0.39  | 0.82 |
| 2000                       | 0.94           | 0.83  | 1.06 | 1.18         | 1.05  | 1.32 | 1.09          | 1.00  | 1.18 | 0.74            | 0.43  | 1.04 |
| 3000                       | 1.03           | 0.91  | 1.15 | 0.95         | 0.82  | 1.08 | 1.04          | 0.94  | 1.13 | 0.67            | 0.43  | 0.91 |
| 4000                       | 1.14           | 1.02  | 1.26 | 0.89         | 0.78  | 1.01 | 1.05          | 0.96  | 1.14 | 0.89            | 0.63  | 1.15 |
| 6000                       | 1.37           | 1.20  | 1.53 | 0.89         | 0.78  | 1.01 | 1.20          | 1.08  | 1.32 | 1.03            | 0.69  | 1.38 |
| 8000                       | 1.75           | 1.60  | 1.90 | 1.34         | 1.21  | 1.48 | 1.60          | 1.49  | 1.71 | 1.33            | 1.02  | 1.65 |
| PTA                        | 0.84           | 0.76  | 0.93 | 0.90         | 0.82  | 0.98 | 0.89          | 0.83  | 0.95 | 0.75            | 0.55  | 0.95 |
| <b>70+ years (n=504)</b>   |                |       |      |              |       |      |               |       |      |                 |       |      |
|                            | Female (n=297) |       |      | Male (n=207) |       |      | White (n=443) |       |      | Black/AA (n=60) |       |      |
| 250                        | 0.66           | 0.53  | 0.80 | 0.70         | 0.52  | 0.88 | 0.70          | 0.59  | 0.82 | 0.50            | 0.21  | 0.79 |
| 500                        | 0.81           | 0.68  | 0.94 | 0.87         | 0.72  | 1.03 | 0.87          | 0.76  | 0.98 | 0.63            | 0.43  | 0.84 |
| 1000                       | 1.09           | 0.96  | 1.22 | 1.14         | 0.97  | 1.31 | 1.14          | 1.03  | 1.25 | 0.95            | 0.68  | 1.22 |
| 2000                       | 1.33           | 1.17  | 1.49 | 1.22         | 1.04  | 1.40 | 1.32          | 1.19  | 1.45 | 1.00            | 0.67  | 1.33 |
| 3000                       | 1.30           | 1.15  | 1.44 | 0.96         | 0.77  | 1.14 | 1.18          | 1.05  | 1.31 | 0.97            | 0.69  | 1.26 |
| 4000                       | 1.17           | 1.03  | 1.31 | 0.84         | 0.67  | 1.01 | 1.05          | 0.93  | 1.17 | 0.86            | 0.57  | 1.14 |
| 6000                       | 1.39           | 1.22  | 1.56 | 1.18         | 0.98  | 1.37 | 1.30          | 1.16  | 1.44 | 1.24            | 0.81  | 1.67 |
| 8000                       | 1.56           | 1.36  | 1.75 | 1.31         | 1.11  | 1.52 | 1.43          | 1.28  | 1.58 | 1.65            | 1.09  | 2.21 |
| PTA                        | 1.10           | 0.98  | 1.22 | 1.03         | 0.91  | 1.14 | 1.10          | 1.01  | 1.19 | 0.81            | 0.56  | 1.05 |

Note. There is uncertainty in stratified analyses in the age group 18-39 years, likely due to small sample sizes; several p-values are >0.05 (see CI). B: Beta coefficient; CI: Confidence Interval; LL: Lower limit; UL: Upper limit; PTA: pure-tone average, calculated from frequencies 500, 1000, 2000 and 4000 Hz averaged across right and left ears; dB: decibel; AA: African American.

†Participants who were not white or Black/African American race (categorized as Other race) were excluded from these analyses given small sample size (n=10; see Table 1).

Supplementary Figure 1: Average rates of audiometric threshold and PTA change (dB) per year, stratified by baseline age group (years), then sex.

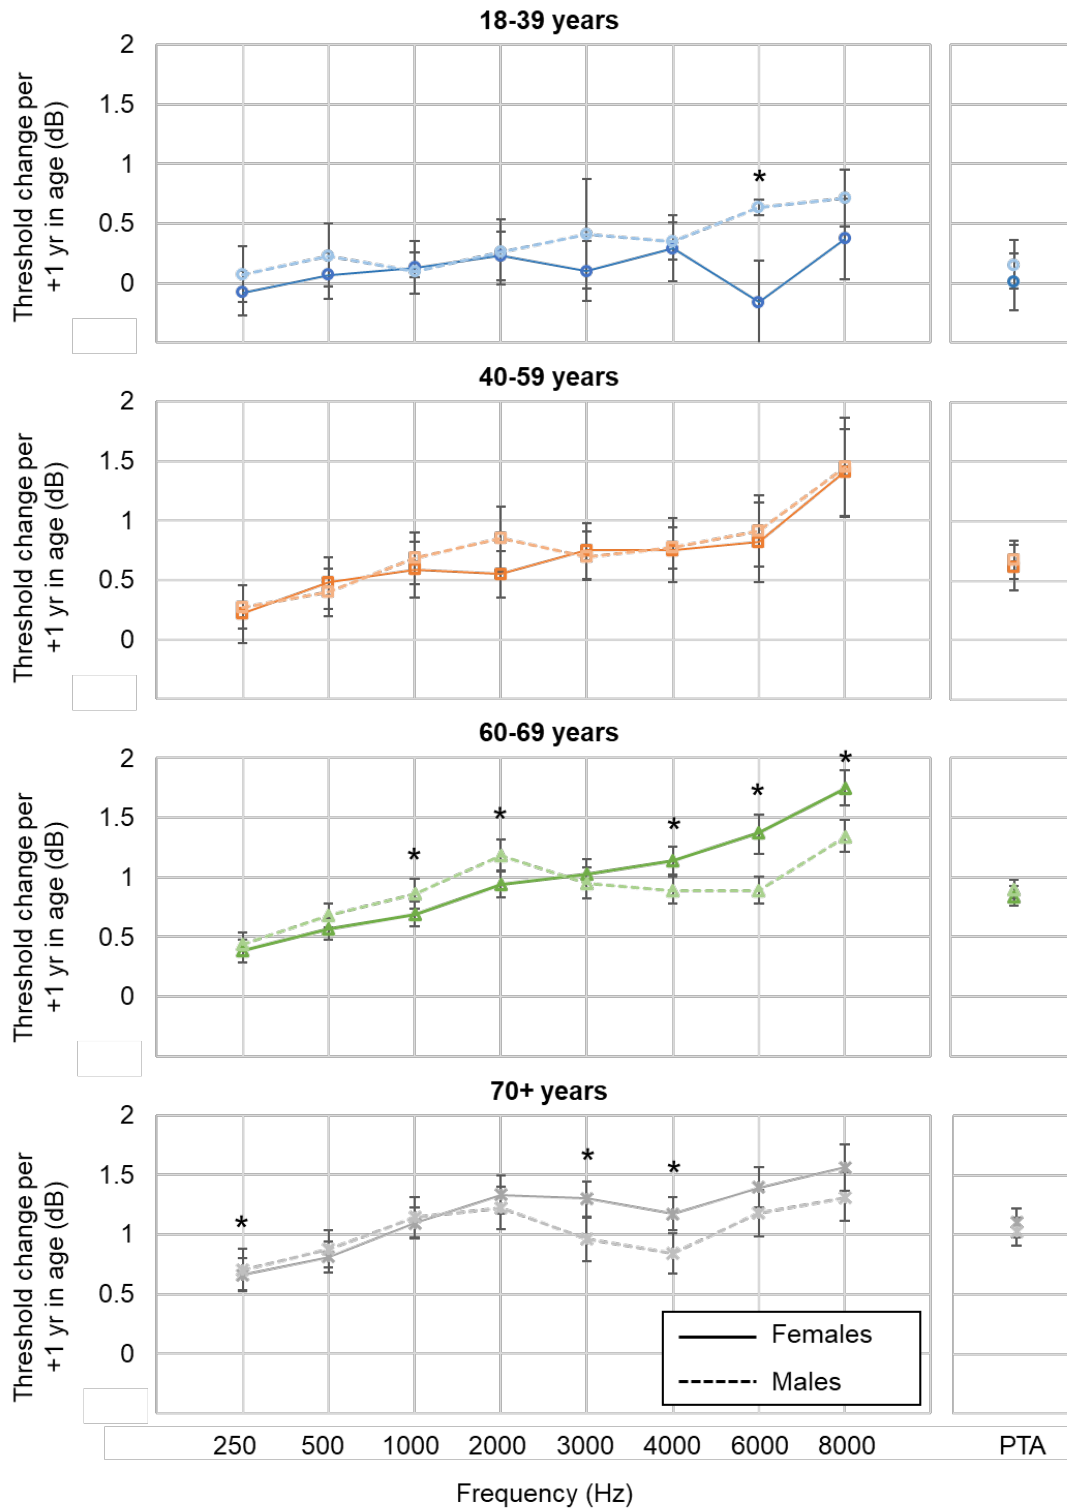

Note. There is uncertainty in stratified analyses in the age group 18-39 years; several p-values are >0.05 (see confidence intervals [error bars] and Supplementary Table 4). dB: decibel.



Supplementary Table 7: Unadjusted estimates of rates of change of audiometric thresholds and PTA (dB), per year.

|                | 95% CI |      |      |
|----------------|--------|------|------|
|                | B      | LL   | UL   |
| Frequency (Hz) |        |      |      |
| 250            | 0.41   | 0.37 | 0.45 |
| 500            | 0.56   | 0.52 | 0.60 |
| 1000           | 0.74   | 0.70 | 0.79 |
| 2000           | 0.98   | 0.93 | 1.03 |
| 3000           | 0.98   | 0.93 | 1.03 |
| 4000           | 0.99   | 0.94 | 1.04 |
| 6000           | 1.16   | 1.10 | 1.23 |
| 8000           | 1.46   | 1.40 | 1.53 |
| PTA            | 0.83   | 0.79 | 0.87 |

Note. B: Beta coefficient; CI: Confidence Interval; LL: Lower limit; UL: Upper limit; PTA: pure-tone average, calculated from frequencies 500, 1000, 2000 and 4000 Hz averaged across right and left ears; dB: decibel.

Supplementary Table 8: Unadjusted estimates of rates of change of audiometric thresholds and PTA (dB), per year, stratified by sex.

|                | Female<br>(n=828) |      |      | Male<br>(n=608) |      |      |
|----------------|-------------------|------|------|-----------------|------|------|
|                | 95% CI            |      |      | 95% CI          |      |      |
|                | B                 | LL   | UL   | B               | LL   | UL   |
| Frequency (Hz) |                   |      |      |                 |      |      |
| 250            | 0.41              | 0.36 | 0.46 | 0.42            | 0.36 | 0.47 |
| 500            | 0.55              | 0.50 | 0.60 | 0.57            | 0.51 | 0.63 |
| 1000           | 0.71              | 0.65 | 0.77 | 0.79            | 0.72 | 0.86 |
| 2000           | 0.91              | 0.84 | 0.98 | 1.07            | 0.99 | 1.15 |
| 3000           | 1.00              | 0.93 | 1.06 | 0.94            | 0.86 | 1.02 |
| 4000           | 1.04              | 0.97 | 1.10 | 0.91            | 0.84 | 0.98 |
| 6000           | 1.23              | 1.15 | 1.31 | 1.06            | 0.98 | 1.14 |
| 8000           | 1.55              | 1.46 | 1.63 | 1.34            | 1.26 | 1.43 |
| PTA            | 0.81              | 0.75 | 0.86 | 0.85            | 0.80 | 0.90 |

Note. B: Beta coefficient; CI: Confidence Interval; LL: Lower limit; UL: Upper limit; PTA: pure-tone average, calculated from frequencies 500, 1000, 2000 and 4000 Hz averaged across right and left ears.

Supplementary Table 9: Unadjusted estimates of rates of change of audiometric thresholds and PTA (dB) per year, stratified by race.

|                | White<br>(n=1180) |      |      | Black/AA <sup>†</sup><br>(n=246) |      |      |
|----------------|-------------------|------|------|----------------------------------|------|------|
|                | 95% CI            |      |      | 95% CI                           |      |      |
|                | B                 | LL   | UL   | B                                | LL   | UL   |
| Frequency (Hz) |                   |      |      |                                  |      |      |
| 250            | 0.44              | 0.40 | 0.48 | 0.31                             | 0.23 | 0.39 |
| 500            | 0.58              | 0.54 | 0.63 | 0.46                             | 0.37 | 0.54 |
| 1000           | 0.79              | 0.74 | 0.84 | 0.56                             | 0.46 | 0.66 |
| 2000           | 1.03              | 0.97 | 1.09 | 0.72                             | 0.60 | 0.84 |
| 3000           | 1.01              | 0.95 | 1.07 | 0.74                             | 0.63 | 0.86 |
| 4000           | 1.01              | 0.95 | 1.06 | 0.80                             | 0.68 | 0.92 |
| 6000           | 1.18              | 1.11 | 1.25 | 0.88                             | 0.74 | 1.02 |
| 8000           | 1.47              | 1.40 | 1.54 | 1.25                             | 1.09 | 1.40 |
| PTA            | 0.86              | 0.82 | 0.90 | 0.65                             | 0.56 | 0.74 |

Note. B: Beta coefficient; CI: Confidence Interval; LL: Lower limit; UL: Upper limit; PTA: pure-tone average, calculated from frequencies 500, 1000, 2000 and 4000 Hz averaged across right and left ears. AA: African American.

<sup>†</sup>Participants who were not white or Black/African American race (categorized as Other race) were excluded from these analyses given small sample size (n=10; see Table 1).

Supplementary Table 10: Unadjusted estimates of rates of change of audiometric thresholds and PTA (dB) per year, stratified by baseline age group.

|                | 18-39 years<br>(n=154) |       |      | 40-59 years<br>(n=231) |      |      | 60-69 years<br>(n=547) |      |      | 70+ years<br>(n=504) |      |      |
|----------------|------------------------|-------|------|------------------------|------|------|------------------------|------|------|----------------------|------|------|
|                | 95% CI                 |       |      | 95% CI                 |      |      | 95% CI                 |      |      | 95% CI               |      |      |
|                | B                      | LL    | UL   | B                      | LL   | UL   | B                      | LL   | UL   | B                    | LL   | UL   |
| Frequency (Hz) |                        |       |      |                        |      |      |                        |      |      |                      |      |      |
| 250            | 0.03                   | -0.13 | 0.19 | 0.24                   | 0.08 | 0.40 | 0.41                   | 0.34 | 0.48 | 0.67                 | 0.57 | 0.78 |
| 500            | 0.15                   | -0.01 | 0.31 | 0.43                   | 0.28 | 0.58 | 0.62                   | 0.55 | 0.69 | 0.83                 | 0.73 | 0.93 |
| 1000           | 0.25                   | 0.06  | 0.44 | 0.63                   | 0.47 | 0.79 | 0.77                   | 0.69 | 0.85 | 1.11                 | 1.01 | 1.21 |
| 2000           | 0.27                   | 0.11  | 0.43 | 0.67                   | 0.51 | 0.84 | 1.05                   | 0.96 | 1.14 | 1.28                 | 1.16 | 1.41 |
| 3000           | 0.34                   | 0.09  | 0.59 | 0.73                   | 0.57 | 0.90 | 1.00                   | 0.91 | 1.09 | 1.16                 | 1.04 | 1.28 |
| 4000           | 0.37                   | 0.17  | 0.57 | 0.77                   | 0.59 | 0.95 | 1.04                   | 0.95 | 1.12 | 1.04                 | 0.93 | 1.15 |
| 6000           | 0.30                   | 0.22  | 0.38 | 0.87                   | 0.63 | 1.10 | 1.19                   | 1.08 | 1.30 | 1.30                 | 1.17 | 1.43 |
| 8000           | 0.58                   | 0.32  | 0.85 | 1.42                   | 1.14 | 1.69 | 1.58                   | 1.47 | 1.68 | 1.46                 | 1.31 | 1.60 |
| PTA            | 0.30                   | 0.14  | 0.46 | 0.64                   | 0.50 | 0.77 | 0.87                   | 0.81 | 0.93 | 1.07                 | 0.98 | 1.15 |

Note. B: Beta coefficient; CI: Confidence Interval; LL: Lower limit; UL: Upper limit; PTA: pure-tone average, calculated from frequencies 500, 1000, 2000 and 4000 Hz averaged across right and left ears.

## Supplementary References

1. Simpson, A. N., Matthews, L. J., Cassarly, C., & Dubno, J. R. Time from hearing-aid candidacy to hearing-aid adoption: A longitudinal cohort study. *Ear Hear.* 40,468-76 (2019).
2. Lee, F. S., Matthews, L. J., Dubno, J. R., & Mills, J. H. Longitudinal study of pure-tone thresholds in older persons. *Ear Hear.* 26,1-1 (2005).
